# Supplementary material
Source: PubMed Central journal article supplement (PMC5801122)
Supplement: NIHMS925499-supplement-3.pdf [file NIHMS925499-supplement-3.pdf]

**Table S1. Serum biochemical parameters of human PSC/IBD patients.** Data was obtained from the University of Minnesota Liver Tissue cell Distribution Center NIH Contract #HHSN276201200017C., MELD (Model for End Stage Liver Disease), INR (International normalized ratio), AST (Aspartate Aminotransferase), Alk Phos (Alkaline Phosphatase). Data are Means+/-SEM, N=9.

| Sex        | Age        | MELD       | Pro Throm<br>INR | Total<br>Bilirubin | Creatinine | AST          | Alk Phos     | Albumin   | Co-<br>diagnosis |
|------------|------------|------------|------------------|--------------------|------------|--------------|--------------|-----------|------------------|
| MALE       | 25         | 23         | 2.25             | 8.2                | 0.84       | 173          | 261          | 2.9       | UC               |
| FEMALE     | 51         | 16         | 1.37             | 4.9                | 0.73       | 105          | 453          | 2.9       | UC               |
| MALE       | 32         | 14         | 1.05             | 5.1                | 0.8        | 86           | 874          | 3.9       | UC               |
| MALE       | 58         | 30         | 1.73             | 11.1               | 0.74       | 200          | 368          | 2.5       | UC               |
| FEMALE     | 27         | 21         | 1.64             | 9.5                | 0.73       | 66           | 369          | 2.2       | UC               |
| MALE       | 59         | 13         | 1.25             | 1.8                | 0.89       | 90           | 767          | 2.8       | UC               |
| MALE       | 48         | 17         | 1.21             | 8.5                | 1          | 124          | 440          | 3.2       | UC               |
| MALE       | 53         | 38         | 1.68             | 26.9               | 5.9        | 44           | 205          | 3.7       | UC               |
| MALE       | 58         | 17         | 1.14             | 10                 | 0.75       | 129          | 548          | 2.8       | UC               |
| Mean+/-SEM | 45.67±4.61 | 21.00±2.75 | 1.48±0.13        | 9.56±2.38          | 1.38±0.57  | 113.00±16.60 | 476.11±73.87 | 2.99±0.18 |                  |
